# Supplementary material
Source: publisher figshare collection journal article supplement (https://karger.figshare.com/ndownloader/files/22657829)
Supplement: Supplementary file 1 [file 22657829]

**Supplementary Material**

Bei den folgenden Fragen handelt es sich um Aspekte der Klinischen Psychologie, die unter Wissenschaftlern und Praktikern im Bereich der Psychotherapie sehr kontrovers diskutiert werden. Wir sind an Ihrer persönlichen Meinung zu diesen Themen interessiert. Bitte beurteilen Sie jede der folgenden Aussagen danach, ob Sie der Aussage zustimmen oder die Aussage ablehnen (1=“stimme überhaupt nicht zu“ bis 6=“stimme stark zu“, außer Frage 18).

1. Der Erfolg einer psychotherapeutischen Behandlung lässt sich nur schwer objektiv erfassen (im Sinne von „messen“).*

2. Die Frage der Wirksamkeit einer psychotherapeutischen Behandlung lässt sich besser auf der Grundlage von klinischer Intuition als durch die Verwendung standardisierter diagnostischer Verfahren beantworten.*

3. Die subjektive Einschätzung eines/r erfahrenen Psychotherapeuten/in ist zuverlässiger als die Ergebnisse aus randomisiert-kontrollierten Studien.*

4. Die Wirksamkeit von Psychotherapie lässt sich aus der Perspektive eines/r erfahrenen Psychotherapeuten/in im Einzelfall viel besser abschätzen als auf der Grundlage groß angelegter randomisiert-kontrollierter Studien.*

5. Große klinische Studien und Meta-Analysen können einzelnen Patientenschicksalen nicht gerecht werden und sind daher für die klinische Praxis weitgehend unbedeutend.*

6. Das Mitteilen der Diagnose einer bestimmten psychischen Störung durch den/die Therapeuten/in an den/die Patienten/in schadet der therapeutischen Beziehung.*

7. Personen, die Suizide ausführen, sind grundsätzlich schwer depressiv.*

8. Niedriges Selbstbewusstsein ist einer der Hauptgründe für psychische Probleme.*

9. Verbesserungen, die im Laufe einer psychotherapeutischen Behandlung beobachtet werden, gehen häufig auf andere Faktoren zurück, die mit der eigentlichen psychotherapeutischen Behandlung nichts zu tun haben.

10. Psychotherapie besitzt im Gegensatz zu medikamentöser Therapie keine Nebenwirkungen.*

11. Es ist wichtig für die psychische Gesundheit, seinem Ärger Luft zu machen (d.h. den Ärger „auszuagieren“).*

12. Positive Veränderungen ereignen sich im Verlauf einer psychotherapeutischen Behandlung oft sehr plötzlich (Bild: „Wenn der Knoten geplatzt ist, sind alle Probleme gelöst.“).

13. Ältere und erfahrene Psychotherapeuten/innen haben meist größere Behandlungserfolge als jüngere Psychotherapeuten/innen zu Beginn ihrer beruflichen Laufbahn.*

14. Den meisten psychischen Störungen liegt ein Konflikt in der frühen Kindheit zu Grunde.*

15. Patienten/innen mit einer psychotischen Störung (z. B. Schizophrenie) sind häufig gewalttätig.*

16. Expositionsbehandlungen (im Sinne der bewussten und geplanten Konfrontation mit einem angstauslösenden Reiz) repräsentieren die wirkungsvollste psychotherapeutische Interventionsmethode bei den meisten Angststörungen.

17. Ein sehr hoher Intelligenzquotient erhöht das Risiko für psychische Störungen.*

18. In dieser Frage interessieren wir uns dafür, ob die Erfahrung eines sexuellen Missbrauchs in der Kindheit einen Einfluss auf das Erwachsenenalter einer Person haben kann. Es gibt keine richtigen oder falschen Antworten. Ihre persönliche Meinung ist wichtig. Stellen Sie sich eine Person mit langen bestehenden emotionalen Problemen und einem Bedarf an Psychotherapie vor.

Wie **plausibel** ist es Ihrer Meinung nach, dass diese Person ein Opfer sexuellen Missbrauchs in der Kindheit ist, auch wenn die Person unfähig ist, den Missbrauch zu erinnern?

| **1**  **Sehr unplausibel** | **2**  **Unplausibel** | **3**  **Plausibel** | **4**  **Sehr plausibel** |
| --- | --- | --- | --- |
|  |  |  |  |

Bitte geben Sie an (1-6), in welchem Maße Sie mit den folgenden Aussagen übereinstimmen oder nicht übereinstimmen.

19. Traumatische Erinnerungen sind häufig verdrängt (was bedeutet, dass Personen auf Grund eines Abwehrmechanismus gegen schmerzhafte Inhalte das traumatische Ereignis nicht erinnern können).*

20. Verdrängte Erinnerungen können durch Therapie wieder korrekt hervorgeholt werden.*

21. Erinnerungen können unzuverlässig sein.

22. Durch Hypnose können Erinnerungen, die einer Person vorher nicht bekannt waren, korrekt wiederhergestellt werden.*

23. Erinnerungen werden ständig neu rekonstruiert und verändern sich jedes Mal, wenn wir uns an etwas erinnern.

24. Die Erinnerung an alles, was wir erlebt haben, wird permanent in unserem Gedächtnis gespeichert, auch wenn wir nicht zu allem Zugang haben.*

25. Manche Menschen haben ein echtes „fotografisches Gedächtnis“.*

26. Mit Anstrengung können wir uns an Ereignisse bis zurück zu unserer Geburt erinnern.*

Anmerkung: *„Mythos“ (wissenschaftlich nicht haltbare Aussage), ansonsten Distraktor (bzw. abweichendes Antwortformat)
